# Supplementary material for: Assessment of the Hemispheric Lateralization of Grapheme-Color Synesthesia with Stroop-Type Tests
Source: PLoS One. 2015 Mar 20;10(3):e0119377. doi: 10.1371/journal.pone.0119377 (PMC4368719; doi:10.1371/journal.pone.0119377)
Supplement: S2 Dataset — (The Excel file contains 1 sheet. Each line corresponds to the data of one subject. The order of subjects is the same as in S1 Dataset. Each letter or number is printed in the case used and in red, green, blue or yellow to denote that they were named that way by synesthetes. Actual colors were adjusted for each synesthete on the screen computer used to correspond to their exact synesthetic colors. For other colors, their name is indicated within brackets. (XLS) [file pone.0119377.s002.xls]

## Sheet: Sheet1
A	3	E [white]	0 [white]	I	1	O	7
A	3	E	7	Y	6	I	2
A	4	2	6 [yellow]	E [purple]	7 [purple]	D [brown]	9 [brown]
J [orange]	N [orange]	A	I [yellow]	O	9	M [brown]	8 [purple]
3 [pink]	6 [pink]	a [white]	4 [brown]	I	8	e [orange]	7
M	A	W	L	F	D	I	Y
P	5	S	U	E	M [purple]	H	9
I	3	U	8	O	0	A	4
O	4 [purple]	U	5	C	2	D	3
O	5	A	4	E	3	Y	I
E	6	7	8	P	2	I	5
I	6	T	7	U	2	N	9
A	5	M	7	[none]	[none]	S	3
I	6	A [white]	1 [white]	O	3	F [brown]	B [brown]
A	6	S	3	E	5	I	1
9	2	M	K	L	7	A	4
M	W	D	8	P	2	U	4
a	6	u	7	o	5	i	1
persian 3	3	persian 4	4	persian 6	6	persian 9	9
A	6	U	5	B [brown]	4 [brown]	I	1
E [white]	I [white]	H [brown]	R [brown]	A	3	C	2
O	5	U	4	I [yellow]	3	A [pink]	8 [pink]
N	5	T	7	D [purple]	4	J	9
A	5	N	7	E	2	I	6
A	5	O	8	M	2	I	1
A	1	I	7	C	3	E [orange]	5 [orange]
A	5	D	3	B	8	I	7
S	2	J	4	E	3	I	5
S	5	U [sea-green]	9 [sea-green]	E	3	O	1
A	4	E	3	T	7	S	6
A	4	M	8	D	2	S	5
M	3	N	2	E	5	F [purple]	7 [purple]
R [brown]	5 [brown]	D	2	E	8	V	3
A	5	G [orange]	F [orange]	P	8	J	3
Actual colors were adjusted for each synesthete to correspond to their exact synesthetic colors.
Letters and numbers are printed here in red, green, blue and yellow simply to denote that they were named that way by synesthetes.
For other colors, the name used by the synesthete is indicated within brackets. For the Iranian subject, we used the persian font when indicated; she used persian to name the colors.
